# Supplementary material for: Unlocking the potential of survival data for model organisms through a new database and online analysis platform: SurvCurv
Source: PubMed Central journal article supplement — Aging Cell. 2013 Jul 22;12(5):910–6. doi: 10.1111/acel.12121 (PMC3824079; doi:10.1111/acel.12121), 2013-07-22
Supplement: acel0012-0910-SD1.pdf [file acel0012-0910-SD1.pdf]

## References of all publications currently publicly available in SurvCurv

- Alic, N., Hoddinott, M. P., Vinti, G. & Partridge, L. 2011 Lifespan extension by increased expression of the *Drosophila* homologue of the IGFBP7 tumour suppressor. *Aging Cell*, **10**(1), 137–147. (doi:10.1111/j.1474-9726.2010.00653.x)
- Barnes, A. I., Wigby, S., Boone, J. M., Partridge, L. & Chapman, T. 2008 Feeding, fecundity and lifespan in female *Drosophila melanogaster*. *Proc Biol Sci*, **275**(1643), 1675–1683. (doi:10.1098/rspb.2008.0139)
- Bjedov, I., Toivonen, J. M., Kerr, F., Slack, C., Jacobson, J., Foley, A. & Partridge, L. 2010 Mechanisms of life span extension by rapamycin in the fruit fly *Drosophila melanogaster*. *Cell Metab*, **11**(1), 35–46. (doi:10.1016/j.cmet.2009.11.010)
- Broughton, S., Alic, N., Slack, C., Bass, T., Ikeya, T., Vinti, G., Tommasi, A. M., Driege, Y., Hafen, E. *et al.* 2008 Reduction of DILP2 in *Drosophila* triages a metabolic phenotype from lifespan revealing redundancy and compensation among DILPs. *PLoS One*, **3**(11), e3721. (doi:10.1371/journal.pone.0003721)
- Broughton, S. J., Slack, C., Alic, N., Metaxakis, A., Bass, T. M., Driege, Y. & Partridge, L. 2010 DILP-producing median neurosecretory cells in the *Drosophila* brain mediate the response of lifespan to nutrition. *Aging Cell*, **9**(3), 336–346. (doi:10.1111/j.1474-9726.2010.00558.x)
- Burger, J. M. S., Buechel, S. D. & Kawecki, T. J. 2010 Dietary restriction affects lifespan but not cognitive aging in *Drosophila melanogaster*. *Aging Cell*, **9**(3), 327–335. (doi:10.1111/j.1474-9726.2010.00560.x)
- Bushey, D., Hughes, K. A., Tononi, G. & Cirelli, C. 2010 Sleep, aging, and lifespan in *Drosophila*. *BMC Neurosci*, **11**, 56. (doi:10.1186/1471-2202-11-56)
- Bushey, D., Tononi, G. & Cirelli, C. 2009 The *Drosophila* fragile X mental retardation gene regulates sleep need. *J Neurosci*, **29**(7), 1948–1961. (doi:10.1523/JNEUROSCI.4830-08.2009)
- Chapman, T., Herndon, L. A., Heifetz, Y., Partridge, L. & Wolfner, M. F. 2001 The Acp26Aa seminal fluid protein is a modulator of early egg hatchability in *Drosophila melanogaster*. *Proc Biol Sci*, **268**(1477), 1647–1654. (doi:10.1098/rspb.2001.1684)
- Chapman, T., Hutchings, J. & Partridge, L. 1993 No reduction in the cost of mating for *Drosophila melanogaster* females mating with spermless males. *Proc Biol Sci*, **253**(1338), 211–217. (doi:10.1098/rspb.1993.0105)
- Chapman, T., Liddle, L. F., Kalb, J. M., Wolfner, M. F. & Partridge, L. 1995 Cost of mating in *Drosophila melanogaster* females is mediated by male accessory gland products. *Nature*, **373**(6511), 241–244. (doi:10.1038/373241a0)
- Chapman, T., Miyatake, T., Smith, H. K. & Partridge, L. 1998 Interactions of mating, egg production and death rates in females of the Mediterranean fruit fly, *Ceratitis capitata*. *Proc Biol Sci*, **265**(1408), 1879–1894. (doi:10.1098/rspb.1998.0516)
- Defays, R., Gómez, F. H., Sambucetti, P., Scannapieco, A. C., Loeschcke, V. & Norry, F. M. 2011 Quantitative trait loci for longevity in heat-stressed *Drosophila melanogaster*. *Exp Gerontol*, **46**(doi:10), 819–826. (doi:10.1016/j.exger.2011.07.003)
- Giannakou, M. E., Goss, M., Jacobson, J., Vinti, G., Leivers, S. J. & Partridge, L. 2007 Dynamics of the action of dFOXO on adult mortality in *Drosophila*. *Aging Cell*, **6**(4), 429–438. (doi:10.1111/j.1474-9726.2007.00290.x)
- Grönke, S., Clarke, D.-F., Broughton, S., Andrews, T. D. & Partridge, L. 2010 Molecular evolution and functional characterization of *Drosophila* insulin-like peptides. *PLoS Genet*, **6**(2), e1000857. (doi:10.1371/journal.pgen.1000857)
- Ikeya, T., Broughton, S., Alic, N., Grandison, R. & Partridge, L. 2009 The endosymbiont Wolbachia increases insulin/IGF-like signalling in *Drosophila*. *Proc Biol Sci*, **276**(1674), 3799–3807. (doi:10.1098/rspb.2009.0778)
- Iqbal, A., Piper, M., Faragher, R. G. A., Naughton, D. P., Partridge, L. & Ostler, E. L. 2009 Chemical changes in aging *Drosophila melanogaster*. *Age (Dordr)*. (doi:10.1007/s11357-009-9105-4)

- Jacobson, J., Lambert, A. J., Portero-Otín, M., Pamplona, R., Magwere, T., Miwa, S., Driege, Y., Brand, M. D. & Partridge, L. 2010 Biomarkers of aging in *Drosophila*. *Aging Cell*, **9**(4), 466–477. (doi:10.1111/j.1474-9726.2010.00573.x)
- Kerr, F., Augustin, H., Piper, M. D. W., Gandy, C., Allen, M. J., Lovestone, S. & Partridge, L. 2009 Dietary restriction delays aging, but not neuronal dysfunction, in *Drosophila* models of Alzheimer's disease. *Neurobiol Aging*. (doi:10.1016/j.neurobiolaging.2009.10.015)
- Masse, I., Molin, L., Mouchiroud, L., Vanhems, P., Palladino, F., Billaud, M. & Solari, F. 2008 A novel role for the SMG-1 kinase in lifespan and oxidative stress resistance in *Caenorhabditis elegans*
- McCulloch, D. & Gems, D. 2003a Body size, insulin/IGF signaling and aging in the nematode *Caenorhabditis elegans*. *Exp Gerontol*, **38**(1-2), 129–136. (doi:10.1016/S0531-5565(02)00147-X)
- McCulloch, D. & Gems, D. 2003b Evolution of male longevity bias in nematodes. *Aging Cell*, **2**(3), 165–173. (doi:10.1046/j.1474-9728.2003.00047.x)
- Narbonne-Reveau, K., Charroux, B. & Royet, J. 2011 Lack of an antibacterial response defect in *Drosophila* Toll-9 mutant. *PLoS One*, **6**(2), e17470. (doi:10.1371/journal.pone.0017470)
- Partridge, L., Alic, N., Bjedov, I. & Piper, M. D. W. 2010 Ageing in *Drosophila*: The role of the insulin/Igf and TOR signalling network. *Exp Gerontol*. (doi:10.1016/j.exger.2010.09.003)
- Piper, M. D. W., Wong, R., Grandison, R. C., Bass, T. M., Martinez, P. M. & Partridge, L. 2010 Water-independent effects of dietary restriction in *Drosophila*. *Proc Natl Acad Sci U S A*, **107**(14), E54–6; author reply E57. (doi:10.1073/pnas.0914686107)
- Rana, A., Seinen, E., Siudeja, K., Muntendam, R., Srinivasan, B., van der Want, J. J., Hayflick, S., Reijngoud, D.-J., Kayser, O. *et al.* 2010 Pantethine rescues a *Drosophila* model for pantothenate kinase-associated neurodegeneration. *Proc Natl Acad Sci U S A*, **107**(15), 6988–6993. (doi:10.1073/pnas.0912105107)
- Slack, C., Werz, C., Wieser, D., Alic, N., Foley, A., Stocker, H., Withers, D. J., Thornton, J. M., Hafen, E. *et al.* 2010 Regulation of lifespan, metabolism, and stress responses by the *Drosophila* SH2B protein, Lnk. *PLoS Genet*, **6**(3), e1000881. (doi:10.1371/journal.pgen.1000881)
- Sofola, O., Kerr, F., Rogers, I., Killick, R., Augustin, H., Gandy, C., Allen, M. J., Hardy, J., Lovestone, S. *et al.* 2010 Inhibition of GSK-3 ameliorates Abeta pathology in an adult-onset *Drosophila* model of Alzheimer's disease. *PLoS Genet*, **6**(9). (doi:10.1371/journal.pgen.1001087)
- Toivonen, J. M., Walker, G. A., Martinez-Diaz, P., Bjedov, I., Driege, Y., Jacobs, H. T., Gems, D. & Partridge, L. 2007 No influence of Indy on lifespan in *Drosophila* after correction for genetic and cytoplasmic background effects. *PLoS Genet*, **3**(6), e95. (doi:10.1371/journal.pgen.0030095)
